# Supplementary material for: Smartphones-Based LiDAR Application for Easy and Accurate Wound Size Measurement
Source: Preprints.org preprint supplement (doi:10.20944/preprints202309.1045.v1), 2023-09-15
Supplement: Supplementary file 1 [file supplementary]

Supplementary Materials 1. iPhone 12 Pro Max key specification and list of cell phones (and devices) that use LiDAR technology.

| Hardware information |
| --- |
| iPhone 12 PRO MAX Key Specifications:  Screen: 6.7 inches  Processor: Apple A14 Bionic  Storage: 128, 256, 512 GB  Camera: Three 12-megapixel rear cameras, 12-megapixel front-facing camera  Weight: 226 grams  List of cell phones (and devices) that Apple produces that utilize LiDAR technology  iPhone 14 Pro Max  iPhone 14 Pro  iPhone 13 Pro Max  iPhone 13 Pro  iPhone 12 Pro  iPhone 12 Pro Max  iPad Pro (2020 Version & Later)  ** Note that no currently any android phones that are being produced with LiDAR technology. |


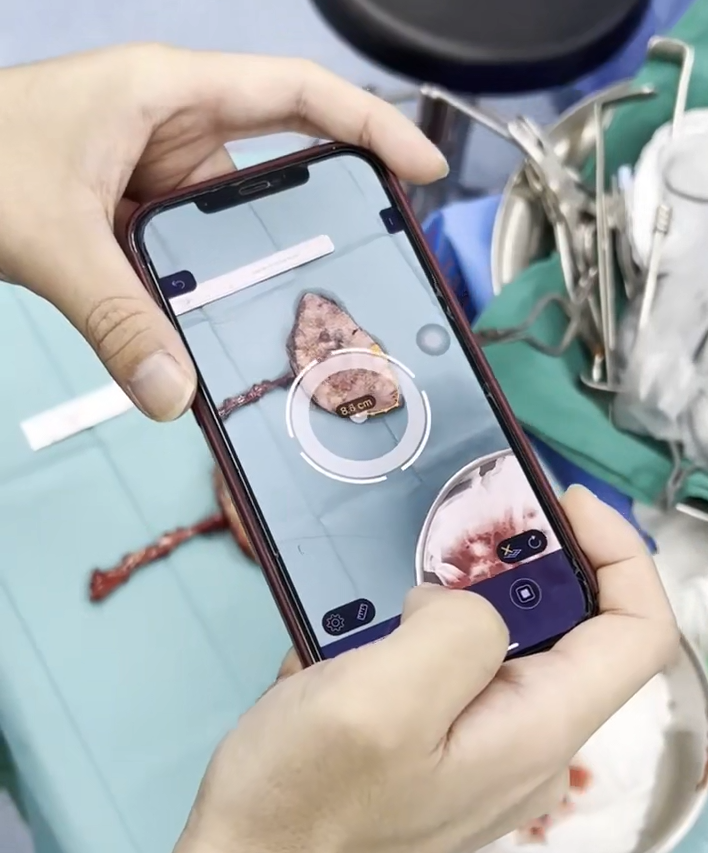


Supplemental video 1. Demonstration of the use of the LiDAR application for actual wound size assessment in the operating field.
